# Supplementary material
Source: PubMed Central journal article supplement (PMC3369702)
Supplement: Supp_Data.pdf [file Supp_Data.pdf]

## Supplementary Data

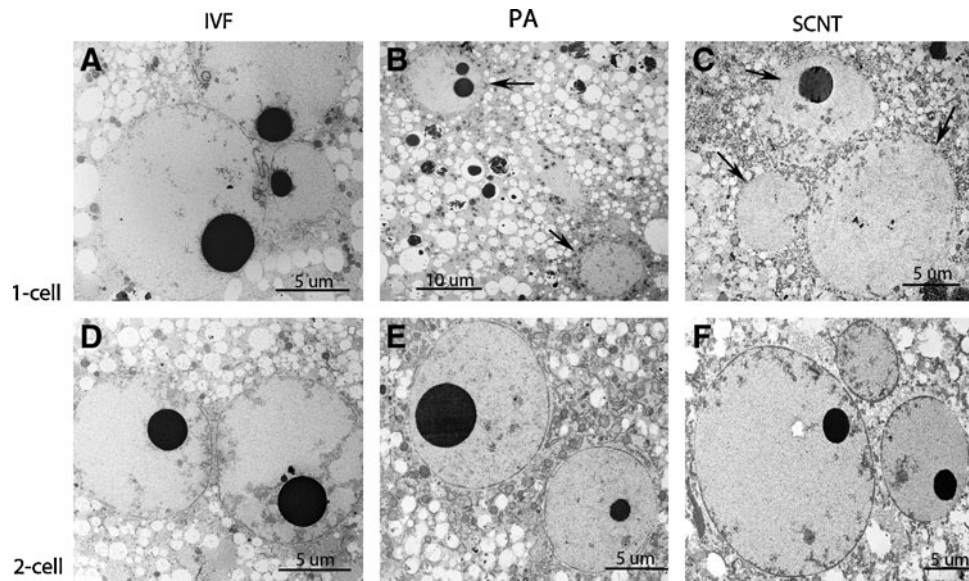

**SUPPLEMENTARY FIG. S1.** Electron micrographs of polynucleated blastomeres found at the one-cell stage (A, B, C) and two-cell stage (D, E, F) in *in vitro* fertilized (A, D), parthenogenetically activated (B, E), and somatic cell nuclear transfer embryos (C, F). Arrows indicate the nuclei.

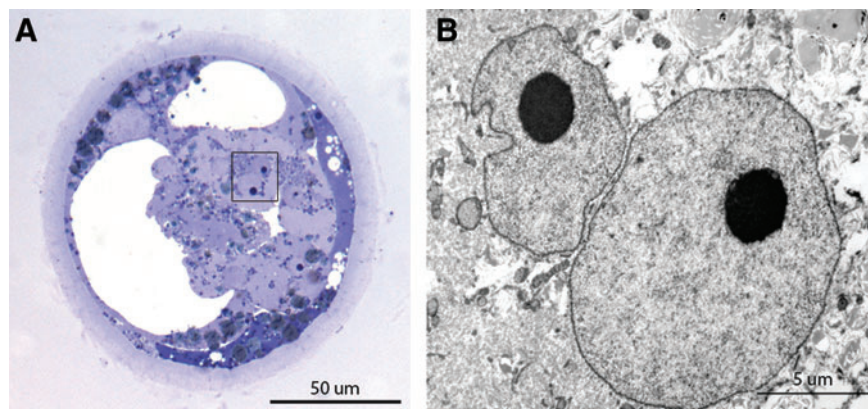

**SUPPLEMENTARY FIG. S2.** Representative light micrographic overview of porcine late blastocyst produced by *in vitro* fertilization showing binucleated cells in presumptive inner cell mass (A); enlarged by transmission electron micrograph (B).
